# Supplementary material for: SARS-CoV-2 Infections and Impact of the COVID-19 Pandemic in Pregnancy and Breastfeeding: Results from an Observational Study in Primary Care in Belgium
Source: PubMed Central journal article supplement (PMC7559009; doi:10.3390/ijerph17186766), 2020-09-17
Supplement: ijerph-17-06766-s001.pdf [file ijerph-17-06766-s001.pdf]

**Table S1.** Characteristics of the study participants.

| Characteristics                   | PREGNANT WOMEN    |                   |                   | BREASTFEEDING WOMEN |                    |                   |
|-----------------------------------|-------------------|-------------------|-------------------|---------------------|--------------------|-------------------|
|                                   | Total<br>(n=2647) | Dutch<br>(n=2344) | French<br>(n=303) | Total<br>(n=3823)   | Dutch<br>(n= 3290) | French<br>(n=533) |
| Age                               |                   |                   |                   |                     |                    |                   |
| <20                               | 0.0% (0)          | 0.0% (0)          | 0.0% (0)          | <0.1% (1)           | <0.1% (1)          | 0.0% (0)          |
| 20-24                             | 2.3% (61)         | 2.4% (55)         | 2.0% (6)          | 1.4% (53)           | 1.4% (45)          | 1.5% (8)          |
| 25-29                             | 29.7% (782)       | 29.9% (699)       | 27.7% (83)        | 21.6% (823)         | 21.5% (707)        | 21.9% (116)       |
| 30-34                             | 52.4% (1381)      | 52.8% (1235)      | 48.7% (146)       | 52.3% (1994)        | 53.1% (1743)       | 47.4% (251)       |
| 35 or older                       | 15.7% (413)       | 14.9% (348)       | 21.7% (65)        | 24.7% (941)         | 23.9% (786)        | 29.2% (155)       |
| Highest degree                    |                   |                   |                   |                     |                    |                   |
| Higher education                  | 84.4% (2226)      | 84.5% (1980)      | 83.7% (246)       | 81.5% (3110)        | 81.4% (2679)       | 81.9% (431)       |
| No higher education               | 15.6% (412)       | 15.5% (364)       | 16.3% (48)        | 18.5% (706)         | 18.6% (611)        | 18.1% (95)        |
| Occupation                        |                   |                   |                   |                     |                    |                   |
| Professionally active             | 94.1% (2478)      | 94.9% (2213)      | 87.5% (265)       | 90.9% (3438)        | 92.2% (3001)       | 82.8% (437)       |
| Not professionally active         | 5.9% (156)        | 5.1% (118)        | 12.5% (38)        | 9.1% (346)          | 7.8% (255)         | 17.2% (91)        |
| Marital status                    |                   |                   |                   |                     |                    |                   |
| Partner                           | 96.9% (2564)      | 97.6% (2287)      | 91.4% (277)       | 96.4% (3684)        | 97.1% (3194)       | 91.9% (490)       |
| No partner                        | 3.1% (83)         | 2.4% (57)         | 8.6% (26)         | 3.6% (137)          | 2.9% (94)          | 8.1% (43)         |
| Gestational trimester             |                   |                   |                   |                     |                    |                   |
| Trimester 1 (0-12w)               | 12.2% (321)       | 12.6% (293)       | 9.2% (28)         | N/A                 | N/A                | N/A               |
| Trimester 2 (13-27w)              | 42.8% (1124)      | 42.8% (994)       | 42.9% (130)       | N/A                 | N/A                | N/A               |
| Trimester 3 (28-40w)              | 45.0% (1180)      | 44.6% (1035)      | 47.9% (145)       | N/A                 | N/A                | N/A               |
| Gravidity                         |                   |                   |                   |                     |                    |                   |
| Primigravida                      | 48.6% (1278)      | 49.1% (1141)      | 45.2% (137)       | N/A                 | N/A                | N/A               |
| Multigravida                      | 51.4% (1349)      | 50.9% (1183)      | 54.8% (166)       | N/A                 | N/A                | N/A               |
| Planned pregnancy                 |                   |                   |                   |                     |                    |                   |
| Yes                               | 92.9% (2440)      | 94.0% (2185)      | 84.2% (255)       | N/A                 | N/A                | N/A               |
| No                                | 7.1% (187)        | 6.0% (139)        | 15.8% (48)        | N/A                 | N/A                | N/A               |
| Pregnancy follow-up mainly by     |                   |                   |                   |                     |                    |                   |
| Obstetrician                      | 86.3% (2249)      | 86.3% (1989)      | 85.8% (260)       | N/A                 | N/A                | N/A               |
| Midwife                           | 10.9% (284)       | 10.5% (242)       | 13.9% (42)        | N/A                 | N/A                | N/A               |
| General practitioner              | 2.4% (63)         | 2.7% (62)         | 0.3% (1)          | N/A                 | N/A                | N/A               |
| Other                             | 0.4% (11)         | 0.5% (11)         | 0% (0)            | N/A                 | N/A                | N/A               |
| Previous breastfeeding experience |                   |                   |                   |                     |                    |                   |
| Yes                               | N/A               | N/A               | N/A               | 54.5% (2011)        | 54.7% (1739)       | 53.5% (272)       |
| No                                | N/A               | N/A               | N/A               | 45.5% (1679)        | 45.3% (1443)       | 46.5% (236)       |

Results are expressed as % (absolute numbers). N/A = not applicable

**Table S2.** Self-reported symptoms of the COVID-19 cases during pregnancy and lactation.

| Symptoms                   | TOTAL             | PREGNANCY   |             |              | LACTATION   |              |              |
|----------------------------|-------------------|-------------|-------------|--------------|-------------|--------------|--------------|
|                            | (n=17)            | Total (n=9) | Dutch (n=7) | French (n=2) | Total (n=8) | Dutch (n= 5) | French (n=3) |
| Headache                   | <b>13 (76.5%)</b> | 7 (77.8%)   | 6 (85.7%)   | 1 (50.0%)    | 6 (75.0%)   | 3 (60.0%)    | 3 (100.0%)   |
| Fever                      | <b>12 (70.6%)</b> | 7 (77.8%)   | 5 (71.4%)   | 2 (100.0%)   | 5 (62.5%)   | 3 (60.0%)    | 2 (66.7%)    |
| Anosmia/dysgeusia/anorexia | <b>11 (64.7%)</b> | 5 (55.6%)   | 5 (71.4%)   | 0 (0.0%)     | 6 (75.0%)   | 3 (60.0%)    | 3 (100.0%)   |
| Muscle pain                | <b>11 (64.7%)</b> | 6 (66.7%)   | 5 (71.4%)   | 1 (50.0%)    | 5 (62.5%)   | 3 (60.0%)    | 2 (66.7%)    |
| Cough                      | <b>9 (52.9%)</b>  | 6 (66.7%)   | 5 (71.4%)   | 1 (50.0%)    | 3 (37.5%)   | 2 (40.0%)    | 1 (33.3%)    |
| Runny nose                 | <b>9 (52.9%)</b>  | 6 (66.7%)   | 6 (85.7%)   | 0 (0.0%)     | 3 (37.5%)   | 2 (40.0%)    | 1 (33.3%)    |
| Shortness of breath        | <b>8 (47.1%)</b>  | 5 (55.6%)   | 4 (57.1%)   | 1 (50.0%)    | 3 (37.5%)   | 2 (40.0%)    | 1 (33.3%)    |
| Sore throat                | <b>6 (35.3%)</b>  | 5 (55.6%)   | 4 (57.1%)   | 1 (50.0%)    | 1 (12.5%)   | 1 (20.0%)    | 0 (0.0%)     |
| Watery diarrhea            | <b>4 (23.5%)</b>  | 3 (33.3%)   | 2 (28.6%)   | 1 (50.0%)    | 1 (12.5%)   | 1 (20.0%)    | 0 (0.0%)     |

Results are expressed as absolute numbers (%).
